# Supplementary material
Source: PubMed Central journal article supplement (PMC4928490)

Darwinolide, a new diterpene scaffold that inhibits methicillin-resistant *Staphylococcus aureus* biofilm from the Antarctic sponge *Dendrilla membranosa*

Jacqueline L. von Salm,<sup>†,†a</sup> Christopher G. Witowski,<sup>†,†b</sup> Renee M. Fleeman,<sup>‡,§</sup> James B. McClintock,<sup>‡</sup> Charles D. Amsler,<sup>‡</sup> Lindsey N. Shaw<sup>‡,§</sup> and Bill J. Baker<sup>†,†,\*</sup>

<sup>†</sup>Department of Chemistry, University of South Florida, 4202 E. Fowler Ave., CHE205, Tampa, Florida 33620, United States, <sup>‡</sup>Center for Drug Discovery and Innovation, University of South Florida, 3720 Spectrum Blvd., Suite 303, Tampa, Florida 33612, United States, <sup>§</sup>Department of Cell Biology, Microbiology and Molecular Biology, University of South Florida, 4202 East Fowler Ave, ISA2015 Tampa, FL 33620, United States, <sup>‡</sup>Department of Biology, University of Alabama at Birmingham, Birmingham, AL 35294, United States

\*Correspondence to Bill J. Baker  
Email: bjbaker@usf.edu

Supporting Information Contents:

- S1: Experimental Procedures for the Isolation of Darwinolide
- S2: Biological Assay Protocols
- S3: X-ray Diffraction Data
- S4: Crystal Data and Structure Refinement
- S5: Bijvoet-Pair Analysis, Bayesian Statistics and Asymmetric Unit of Darwinolide
- S6: HRESI Mass Spectrum of Darwinolide
- S7: <sup>1</sup>H NMR Spectrum of Darwinolide in CDCl<sub>3</sub>, 500 MHz
- S8: <sup>13</sup>C NMR Spectrum of Darwinolide in CDCl<sub>3</sub>, 125 MHz
- S9: gCOSY Spectrum of Darwinolide in CDCl<sub>3</sub>, 500 MHz
- S10: ROESYAD Spectrum of Darwinolide in CDCl<sub>3</sub>, 500 MHz
- S11: Expansion of ROESYAD Spectrum of Darwinolide (CDCl<sub>3</sub>, 500 MHz) highlighting important correlations of H-14 (3.93 ppm).
- S12: gHSQCAD Spectrum of Darwinolide in CDCl<sub>3</sub>, 500 MHz
- S13: gHMBCAD Spectrum of Darwinolide in CDCl<sub>3</sub>, 500 MHz

## S1: Experimental Procedures for the Isolation of Darwinolide

**General Procedures.** All solvents were obtained from Fisher Scientific Co. and were HPLC grade (>99% purity) unless otherwise stated. All HPLC analysis was performed on a Shimadzu LC20-AT system equipped with a photodiode array detector (M20A) using semi-preparative [Phenomenex Luna C18 (250 x 10 mm, 5  $\mu$ m)] or analytical [Phenomenex Luna Silica (250 x 4.6 mm, 5  $\mu$ m)] conditions. Analytical LCMS was performed on a Phenomenex Kinetex C18 column (50 x 2.1 mm, 2.6  $\mu$ m) with an Agilent 6540 LC/QToF-MS with electrospray ionization detection. Optical rotations were measured on a Rudolph Research Analytical AUTOPOL IV digital polarimeter. Other spectroscopic data was collected on an Agilent Cary 630 FTIR or Cary 60 UV-Vis spectrometer. All NMR spectra were acquired in CDCl<sub>3</sub> with residual solvent referenced as an internal standard (7.26 ppm). All <sup>1</sup>H NMR spectra were recorded on a Varian 500 MHz direct-drive instrument equipped with cold-probe detection and <sup>13</sup>C NMR spectra were recorded at 125 MHz.

**Collection of *Dendrilla membranosa*.** Sponge samples were collected from various sites around Palmer Station, Antarctica in the austral summer of 2011. The collection sites chosen were Norsel Point (64°45.674'S, 64°05.467'W), Bonaparte Point (64°46.748'S, 64°02.542'W), Gamage Point (64°46.345'S 64°02.915'W), and Laggard Island (64°48.568'S, 64 00.984'W) at depths between 5-35 m below sea level. Samples were frozen and transported back to the University of South Florida at -70°C where tissues were lyophilized and stored at -80°C until further processing.

**Extraction and Isolation of Natural Products.** 25.7 g of freeze-dried *D. membranosa* was extracted with dichloromethane (ACS grade) in triplicate, combined, and concentrated *in vacuo*. The lipophilic extract (994 mg) was absorbed onto Waters Sep-Pak® C18 cartridges and eluted with acetonitrile. The dried eluate (205 mg) was separated by isocratic semi-preparative HPLC using 60% acetonitrile in water for 35 min and ramping up to 100% acetonitrile after 50 min to afford (in retention time order) membranolide (8.7 mg), aplysulphurin (10.2 mg), tetrahydroaplysulphurin (1.5 mg), and darwinolide (2.0 mg). Normal phase chromatography was used to further purify aplysulphurin and tetrahydroaplysulphurin utilizing isocratic conditions (12% ethyl acetate in hexanes).

## S2: Biological Assay Protocols

**Cytotoxicity Assay.** The J774.A-1 cell line was used for cytotoxicity screening via a colorimetric method employing a tetrazolium derivative [3-(4,5-dimethylthiazol-2-yl)-5-(3-carboxymethoxyphenyl)-2-(4-sulfophenyl)-2H-tetrazolium] (MTS) and an electron-coupling reagent, penazine methosulphate (PMS). Procedures have been described by us previously.<sup>1</sup>

**Assay Against Methicillin-Resistant *Staphylococcus aureus*.** A clinical, multi-drug resistant strain of MRSA (CBD-635) was used in these studies for minimum inhibitory concentration (MIC) determination and assessment of anti-biofilm properties, all as described by us previously.<sup>2</sup>

1. von Salm, J.L.; Wilson, N.G.; Vesely, B.A.; Kyle, D.E.; Cuce, J.; Baker, B.J. *Org. Lett.* **2014**, *16*, 2630-2633.
2. Fleeman, R.M.; LaVoi, T.; Santos, R.G.; Morales, A.; Nefzi, A.; Welmaker, G.S.; Medina-Franco, J.; Houghten, R.A.; Giulianotti, M.A.; Shaw, L.N. *J. Med. Chem.* **2015**, *58*, 3340-3355.

### S3: X-ray Diffraction Data for Darwinolide

The X-ray diffraction data for darwinolide were measured on Bruker Smart Apex2 and for remaining crystals, on Bruker D8 Venture PHOTON 100 CMOS system equipped with a Cu K $\alpha$  INCOATEC ImuS micro-focus source ( $\lambda = 1.54178 \text{ \AA}$ ). Indexing was performed using APEX2<sup>1</sup> (Difference Vectors method).<sup>1</sup> Data integration and reduction were performed using SaintPlus 6.01.<sup>2</sup> Absorption correction was performed by multi-scan method implemented in SADABS.<sup>3</sup> Space group was determined using XPREP implemented in APEX3 [1]. Structure was solved using SHELXS-97 (direct methods) and refined using SHELXL-2015<sup>4-6</sup> (full-matrix least-squares on F<sup>2</sup>) through OLEX2 interface program.<sup>7</sup> All non-hydrogen atoms were refined anisotropically. Hydrogen atoms of -CH, -CH<sub>2</sub> and -CH<sub>3</sub> groups were placed in geometrically calculated positions and were included in the refinement process using riding model with isotropic thermal parameters: Uiso(H) = 1.2[1.5]Ueq(-CH,-CH<sub>2</sub>,-CH<sub>3</sub>). Results of Bijvoet-Pair Analysis and Bayesian Statistics<sup>8,9</sup> validating the absolute configuration assignment, are in Table 2. Value of “P2” is a probability that the current model is correct assuming two possibilities only - one of the two possible enantiomers present. Crystal data and refinement conditions are shown in Table 1. The asymmetric unit of darwinolide is shown in Figure 3 of the manuscript.

1. Bruker APEX2 (V2013.6-2). 2014, Bruker AXS Inc., Madison, Wisconsin, USA.
2. Bruker SAINT (V8.32A). Data Reduction Software. 2013, Bruker AXS Inc., Madison, Wisconsin, USA.
3. Sheldrick, G.M. *SADABS*. Program for Empirical Absorption (Correction), 1996, University of Gottingen, Germany.
4. Sheldrick, G.M. *SHELXL-97*. Program for Crystal Structure Refinement, 1997, University of Göttingen, Germany.
5. Sheldrick, G.M. *Acta Cryst.* **1990**, *A46*, 467-473.
6. Sheldrick, G.M. *Acta Cryst.* **2008**, *A64*, 112-122.
7. Dolomanov, O.V.; Bourhis, L.J.; Gildea, R.J.; Howard, J.A.K.; Puschmann, H. *J. Appl. Cryst.* **2009**, *42*, 339-341.
8. Spek, A.L. *Acta Cryst.* **2009**, *D65*, 148-155.
9. Hooft, R.W.W.; Straver, L.H.; Spek, A.L. *J. Appl. Cryst.* **2008**, *41*, 96-103.

#### S4: Crystal Data and Structure Refinement

|                                             |                                                               |
|---------------------------------------------|---------------------------------------------------------------|
| Identification code                         | JF_DMI8_om                                                    |
| Empirical formula                           | C <sub>22</sub> H <sub>32</sub> O <sub>5</sub>                |
| Formula weight                              | 376.47                                                        |
| Temperature/K                               | 99.99                                                         |
| Crystal system                              | orthorhombic                                                  |
| Space group                                 | P <sub>2</sub> <sub>1</sub> <sub>2</sub> <sub>1</sub>         |
| a/Å                                         | 7.6629(6)                                                     |
| b/Å                                         | 9.5182(8)                                                     |
| c/Å                                         | 27.012(2)                                                     |
| α/°                                         | 90                                                            |
| β/°                                         | 90                                                            |
| γ/°                                         | 90                                                            |
| Volume/Å <sup>3</sup>                       | 1970.2(3)                                                     |
| Z                                           | 4                                                             |
| ρ <sub>calc</sub> /cm <sup>3</sup>          | 1.269                                                         |
| μ/mm <sup>-1</sup>                          | 0.714                                                         |
| F(000)                                      | 816.0                                                         |
| Crystal size/mm <sup>3</sup>                | 0.21 × 0.03 × 0.02                                            |
| Radiation                                   | CuKα (λ = 1.54178)                                            |
| 2θ range for data collection/°              | 6.544 to 136.638                                              |
| Index ranges                                | -9 ≤ h ≤ 9, -11 ≤ k ≤ 11, -32 ≤ l ≤ 32                        |
| Reflections collected                       | 14341                                                         |
| Independent reflections                     | 3600 [R <sub>int</sub> = 0.0724, R <sub>sigma</sub> = 0.0530] |
| Data/restraints/parameters                  | 3600/0/249                                                    |
| Goodness-of-fit on F <sup>2</sup>           | 1.049                                                         |
| Final R indexes [I ≥ 2σ (I)]                | R <sub>1</sub> = 0.0425, wR <sub>2</sub> = 0.0889             |
| Final R indexes [all data]                  | R <sub>1</sub> = 0.0560, wR <sub>2</sub> = 0.0951             |
| Largest diff. peak/hole / e Å <sup>-3</sup> | 0.21/-0.23                                                    |
| Flack parameter                             | 0.03(16)                                                      |

S5: Bijvoet-Pair Analysis, Bayesian Statistics and Asymmetric Unit of Darwinolide

| Table 2. Results Bijvoet-Pair Analysis and Bayesian Statistics |                           |
|----------------------------------------------------------------|---------------------------|
| Space Group P212121                                            | Student-T Prob. Plot      |
| Wavelength 1.54178                                             | Sample Size. 1491         |
| Flack x .... 0.03(16)                                          | Corr. Coeff. 0.999        |
| Parsons z .. 0.07(16)                                          | Intercept .. 0.042        |
|                                                                | Slope ..... 0.892         |
|                                                                |                           |
| Bijvoet Pairs 1501                                             | Bayesian Statistics       |
| Coverage ... 99                                                | Student_T Nu 100          |
| DiffCalcMax. 23.54                                             | Select Pairs 1501         |
| Outlier Crit 47.08                                             | Theta_Min .. 7.60         |
| Scatter Plot                                                   | Theta_Max .. 68.32        |
| Sigma Crit.. 0.25                                              | <b>P2(true).... 1.000</b> |
| Select Pairs 15                                                | P3(true).... 0.944        |
| Number Plus 12                                                 | P3(rac-twin) 0.056        |
| Number Minus 3                                                 | P3(false) .. 0.5E-06      |
| Slope ..... 1.574                                              | G ..... 0.8188            |
|                                                                | G (su) ..... 0.3353       |
|                                                                | Hooft y ... 0.09(17)      |

# S6: HRESI+ Mass Spectrum of Darwinolide

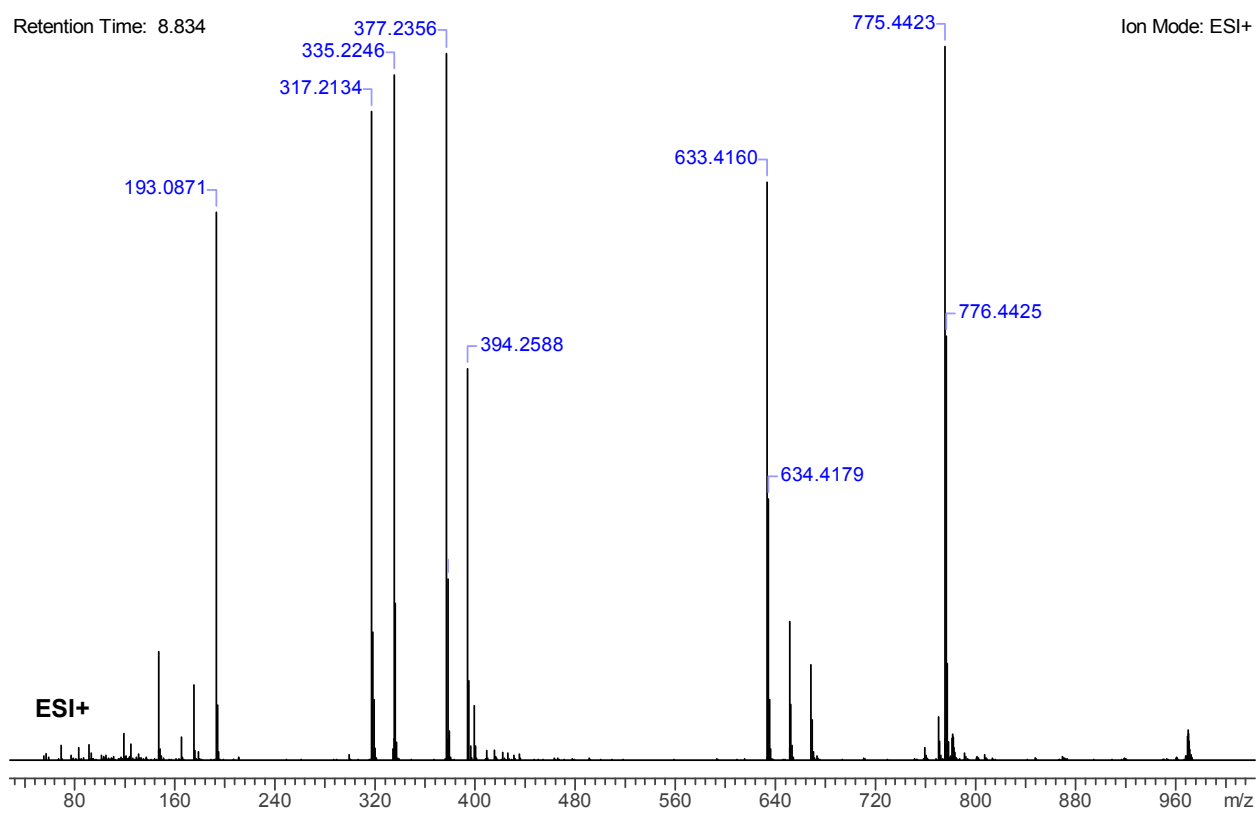

S7.  $^1\text{H}$  NMR Spectrum of Darwinolide in  $\text{CDCl}_3$ , 500 MHz

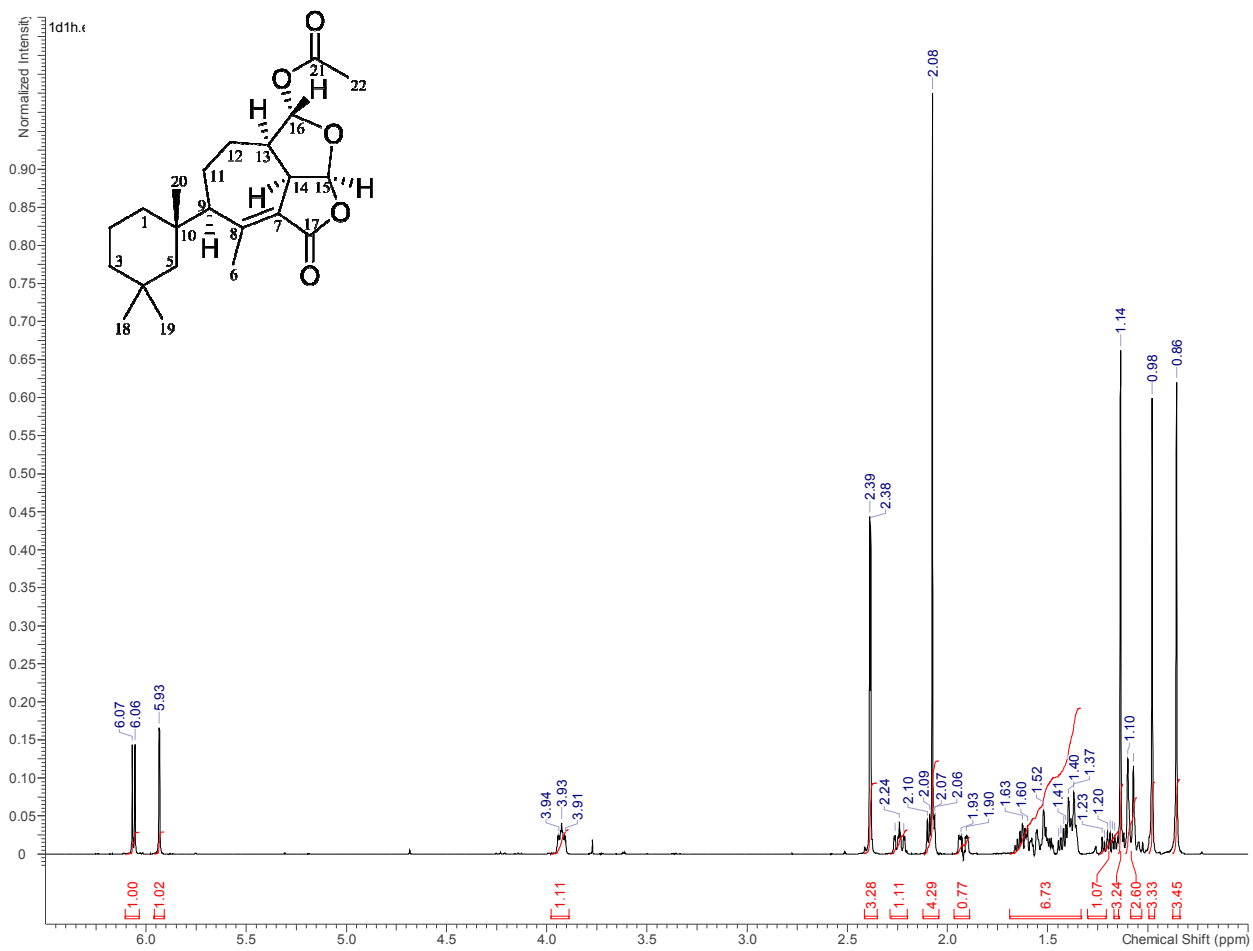



S8:  $^{13}\text{C}$  NMR Spectrum of Darwinolide in  $\text{CDCl}_3$ , 125 MHz

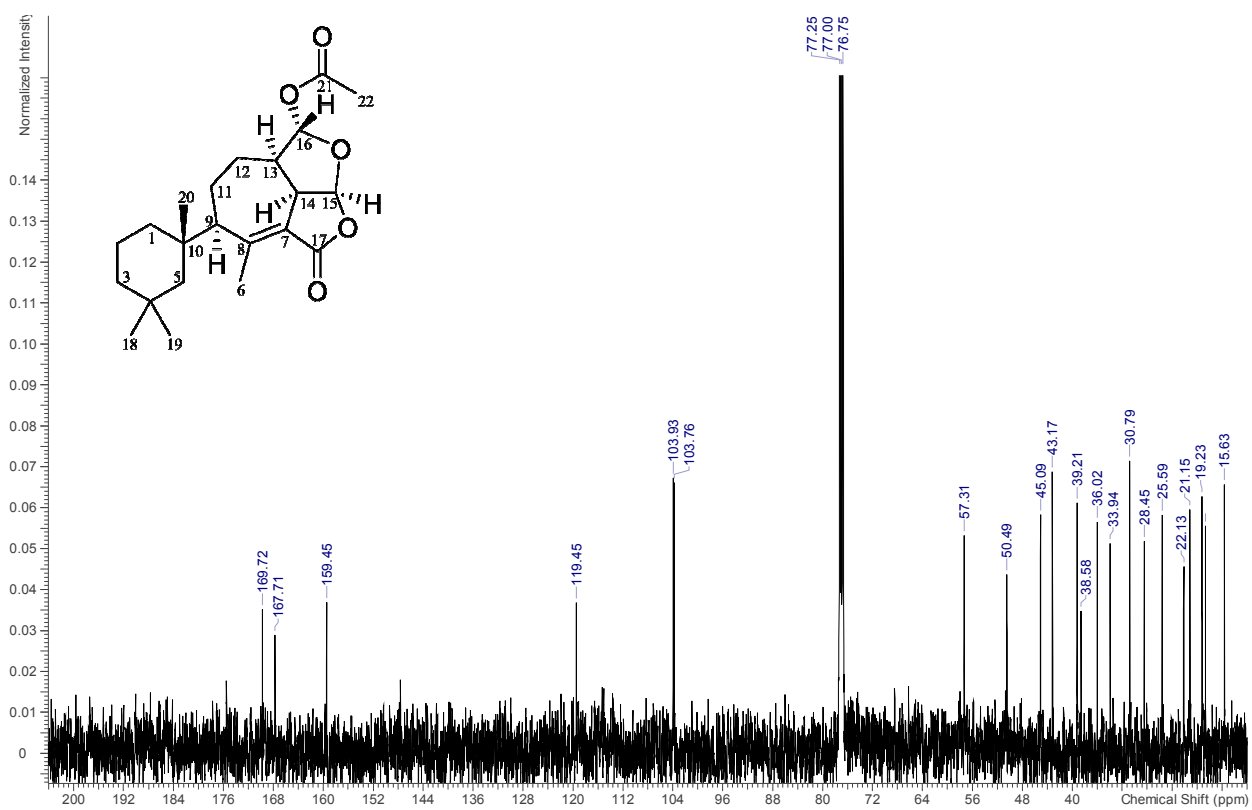

S9: gCOSY Spectrum of Darwinolide in CDCl<sub>3</sub>, 500 MHz

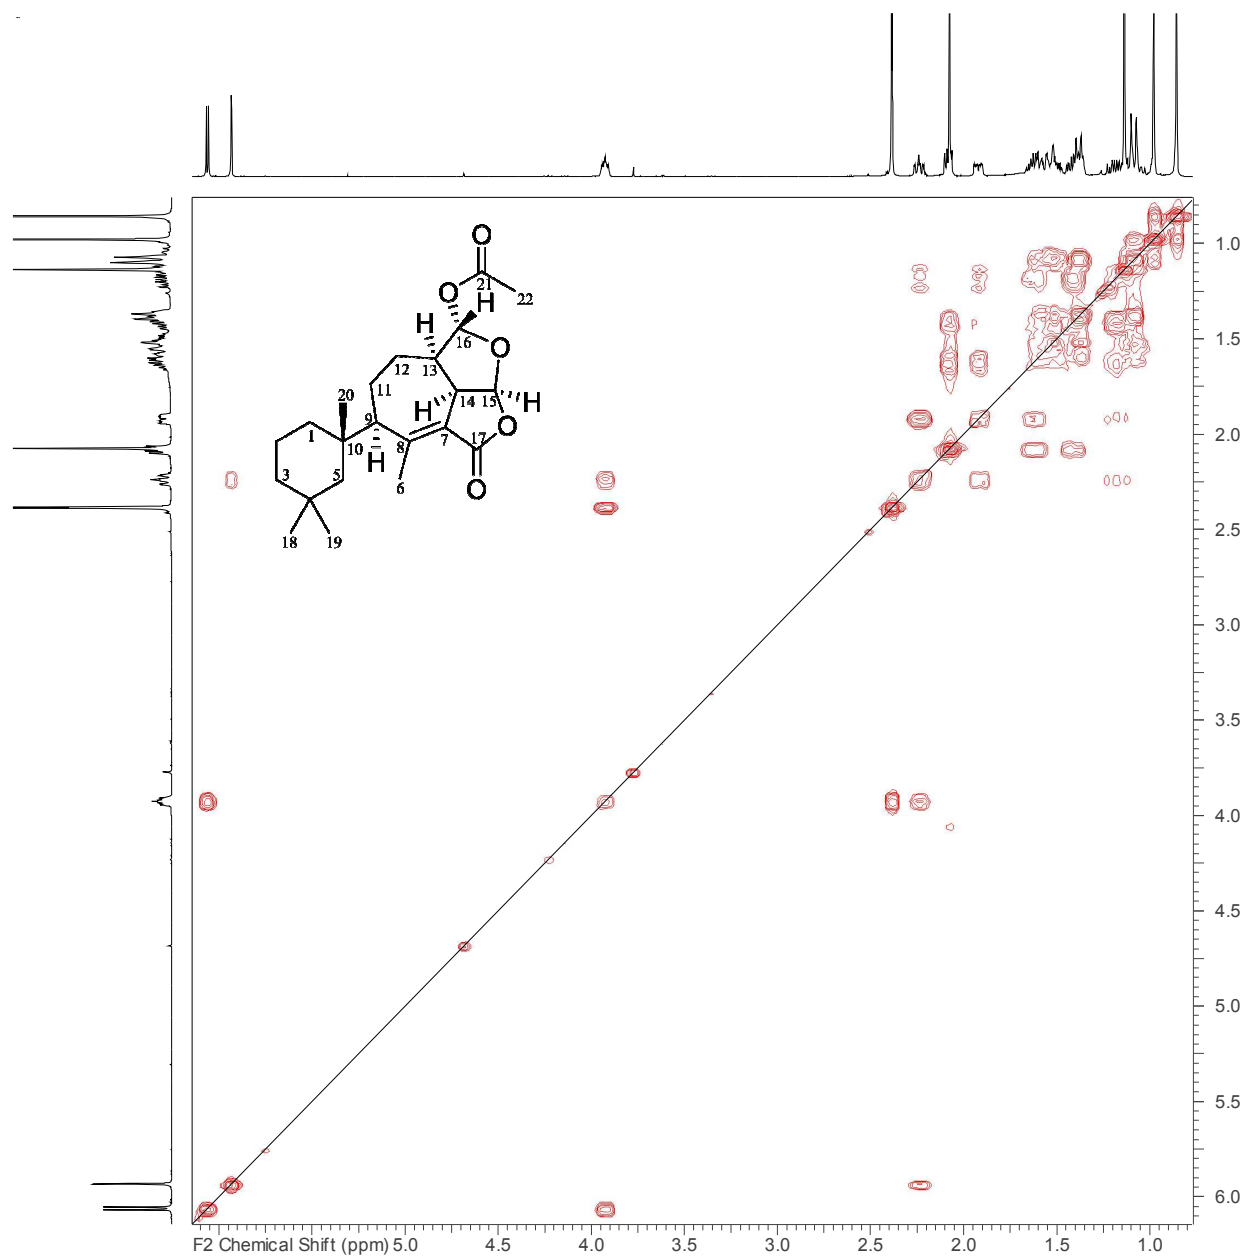

S10: ROESYAD Spectrum of Darwinolide in CDCl<sub>3</sub>, 500 MHz

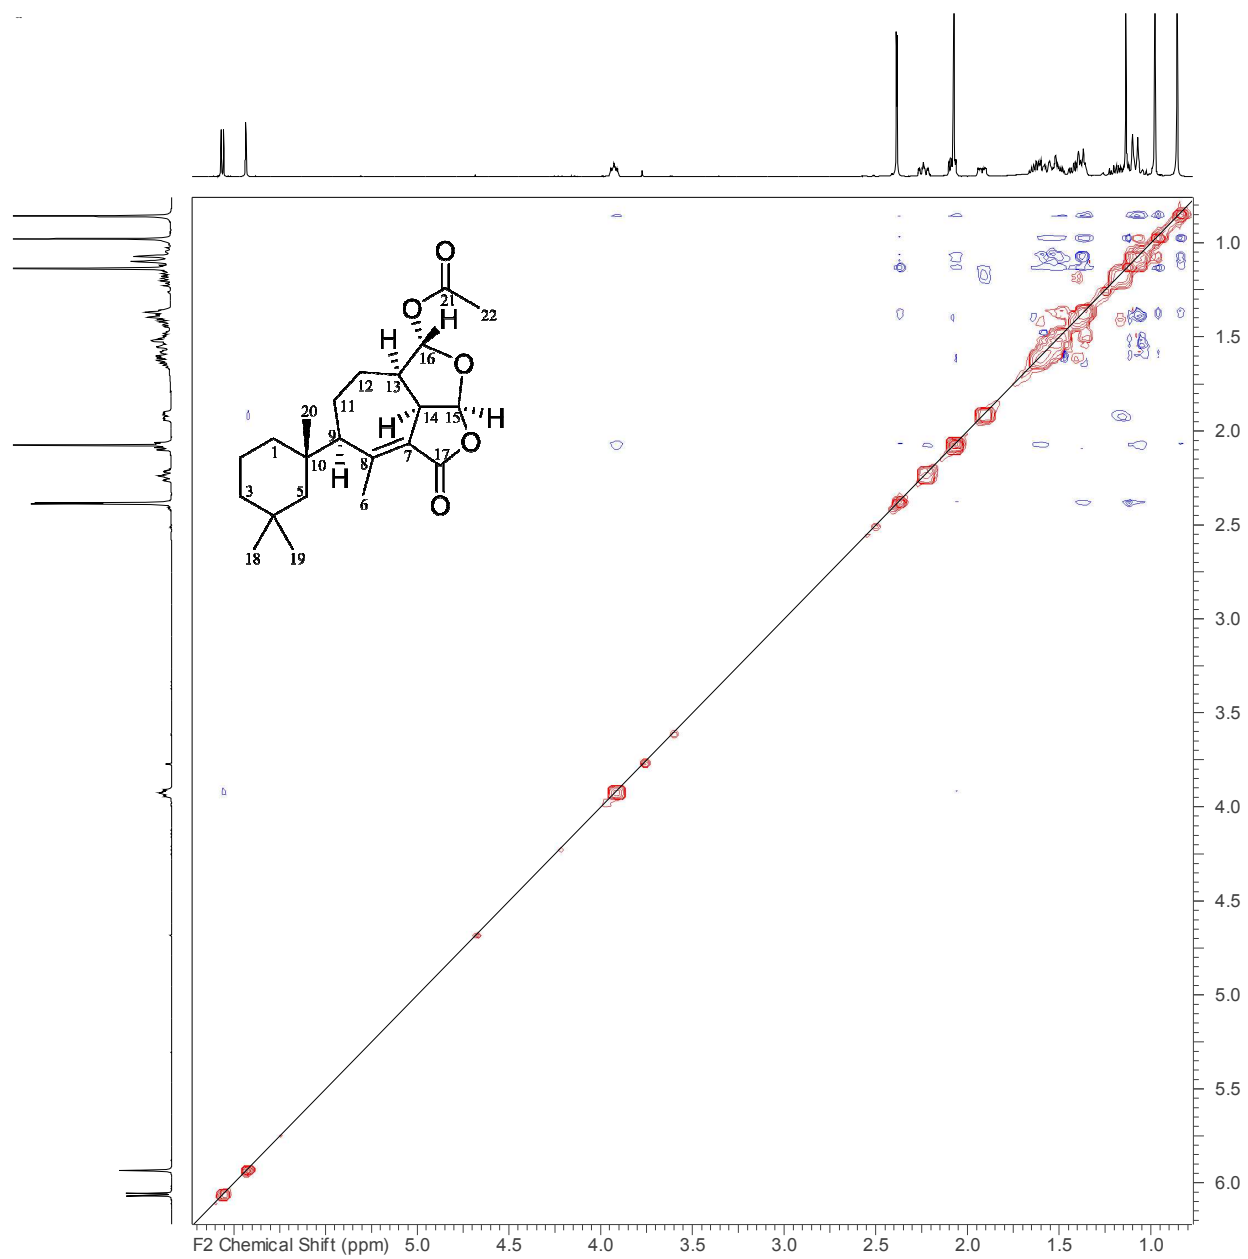

S11: Expansion of ROESYAD Spectrum of Darwinolide (CDCl<sub>3</sub>, 500 MHz) Optimized to Highlight Important Correlations of H-14 (3.93 ppm).

DMI-8\_ROESYAD\_01.fid.esp

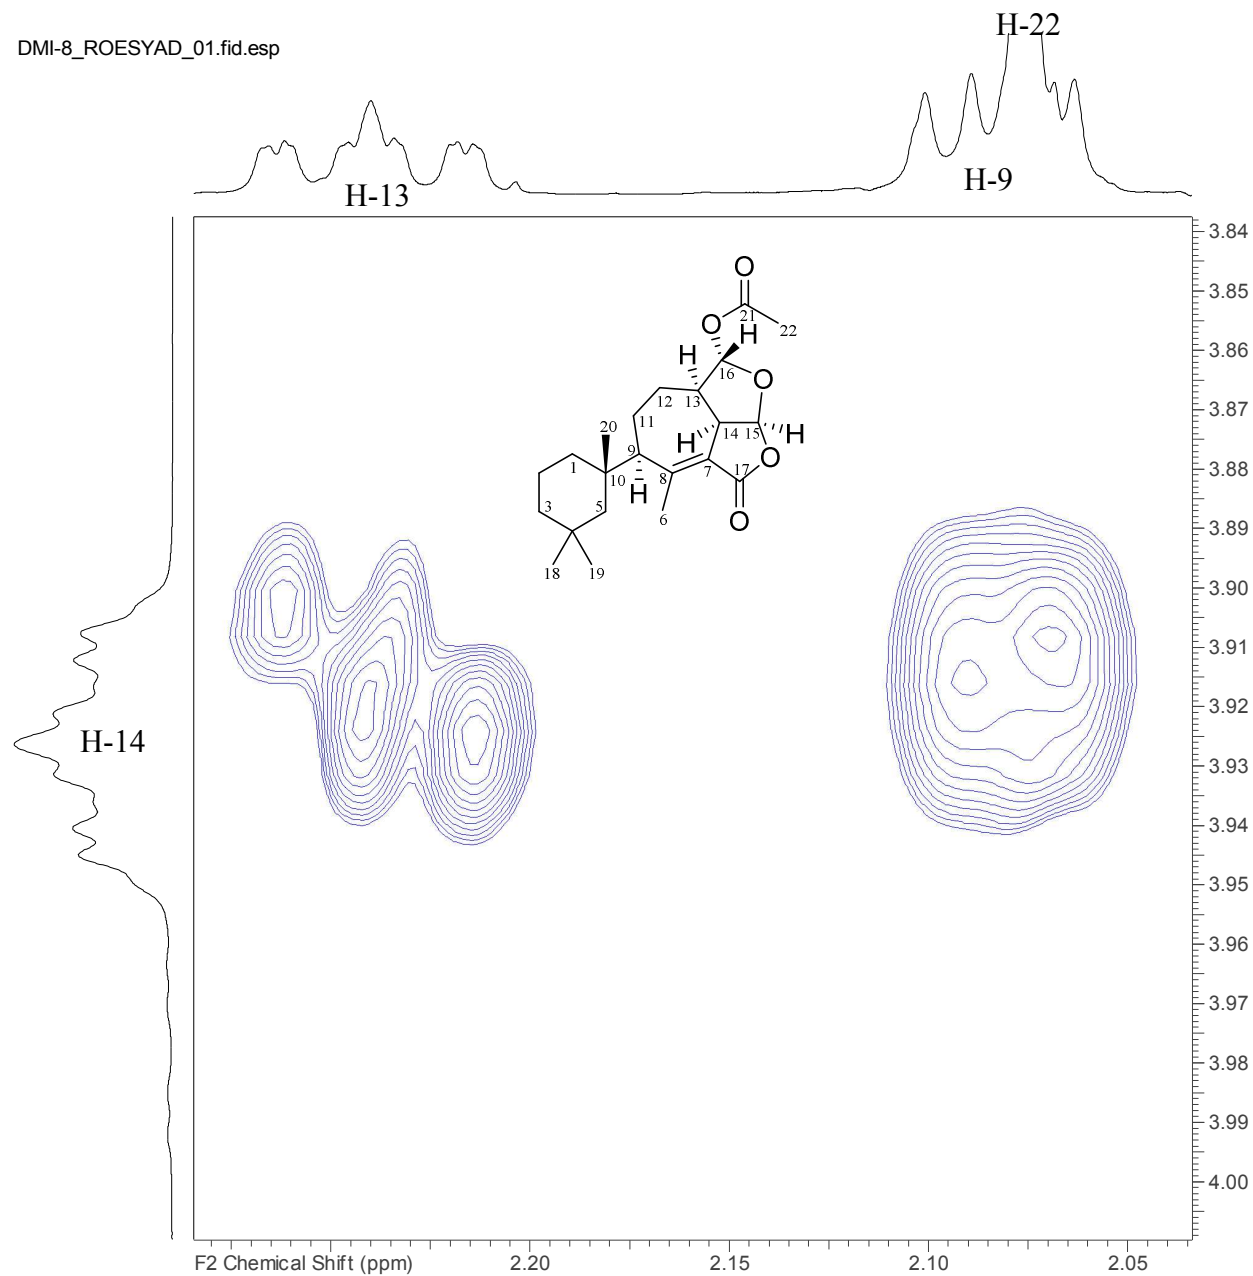

S12: gHSQCAD Spectrum of Darwinolide in CDCl<sub>3</sub>, 500 MHz

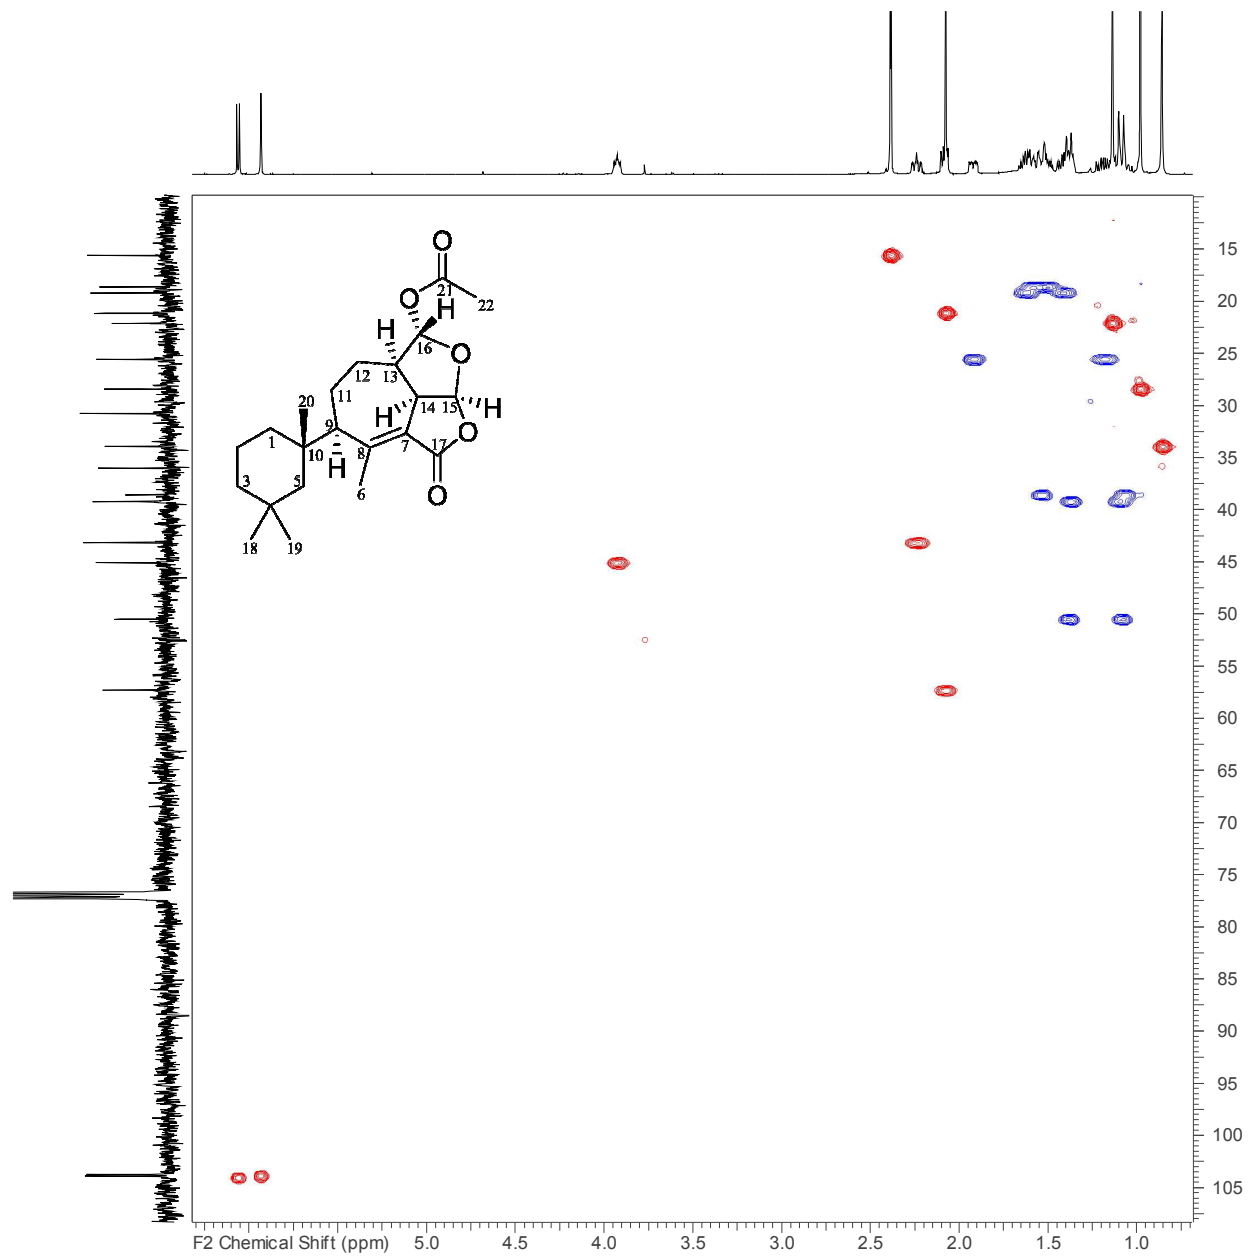

S13: gHMBCAD Spectrum of Darwinolide in CDCl<sub>3</sub>, 500 MHz

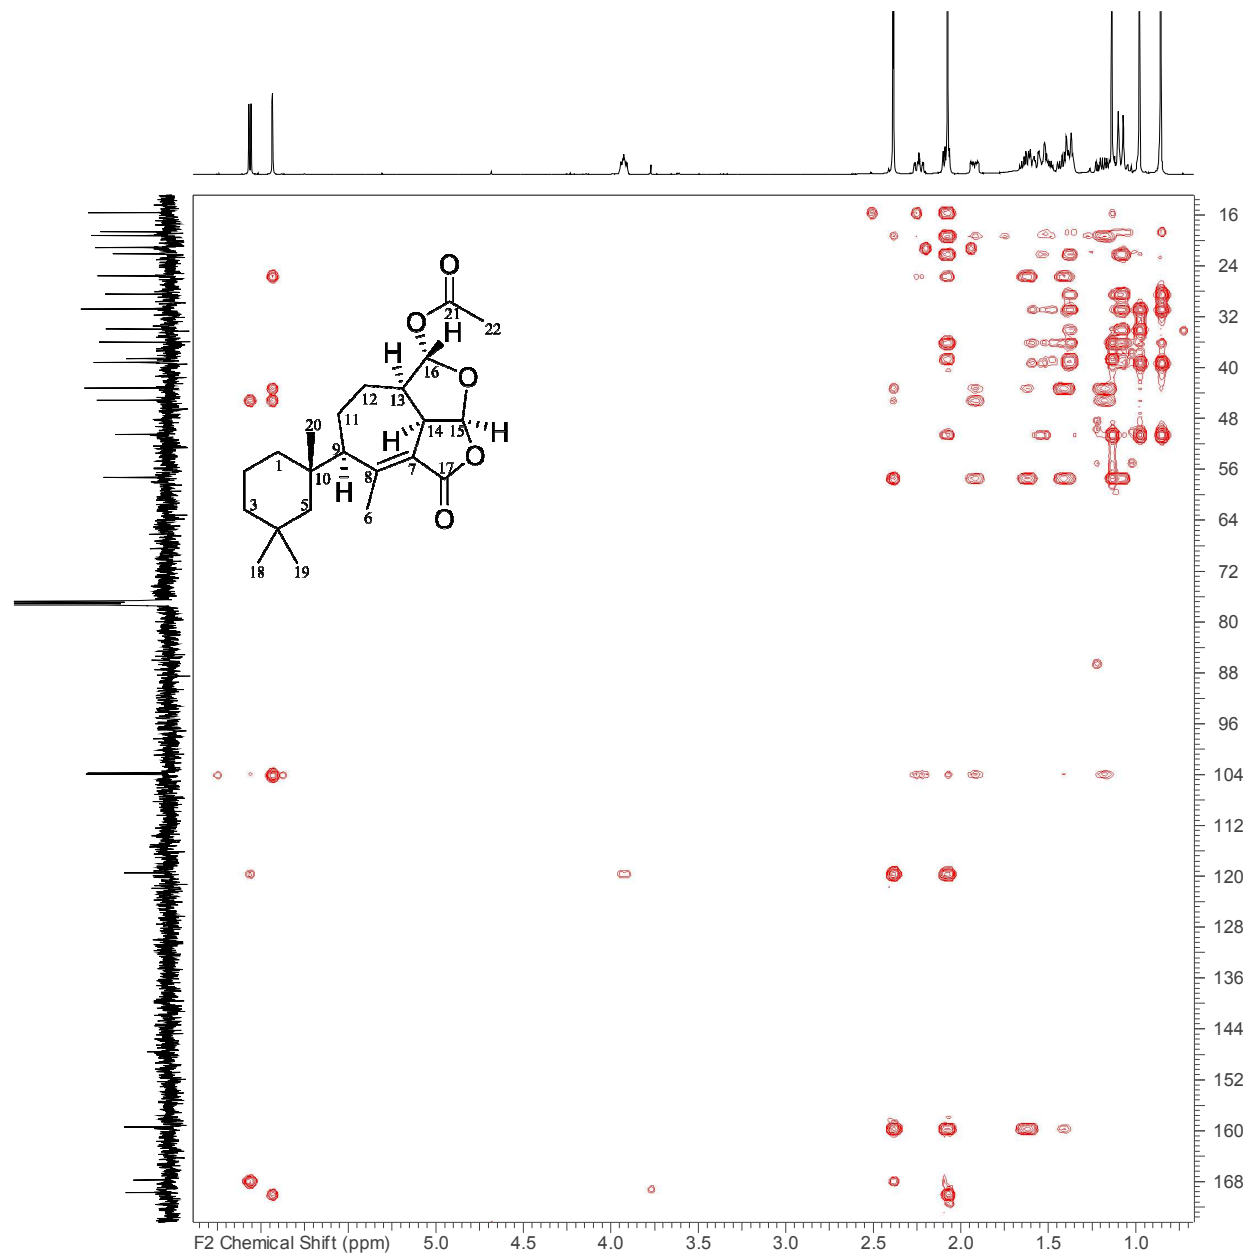

Supplement: ol6b00979_si_001.pdf [file ol6b00979_si_001.pdf]
